# Supplementary material for: Synergy between Common γ Chain Family Cytokines and IL-18 Potentiates Innate and Adaptive Pathways of NK Cell Activation
Source: PubMed Central journal article supplement (PMC4801862; doi:10.3389/fimmu.2016.00101), 2016-03-22

## Supplementary Material

### Synergy between common $\gamma$ chain family cytokines and IL-18 potentiates innate and adaptive pathways of NK cell activation

Carolyn M. Nielsen\*, Asia-Sophia F.M. Wolf\*, Martin R. Goodier, Eleanor M. Riley<sup>§</sup>.

**§ Corresponding author:**

Professor Eleanor M. Riley    [eleanor.riley@lshtm.ac.uk](mailto:eleanor.riley@lshtm.ac.uk)    tel: 020 7927 2706

This supplementary material shows an extended titration of IL-12 and IL-18 in combination, titrations of IFN- $\alpha$  and IL-21, and the effects of various cytokines on IL-12R $\beta$ 2.

**Supplementary Figure 1. Extended IL-12/IL-18 titrations.** PBMC were stimulated with medium alone, or increasing concentrations of IL-12 and/or IL-18 (as labelled on graphs). NK cell surface expression of IFN- $\gamma$  (A) and CD25 (B) after 18 hours.  $n=2$ , data from one experiment.

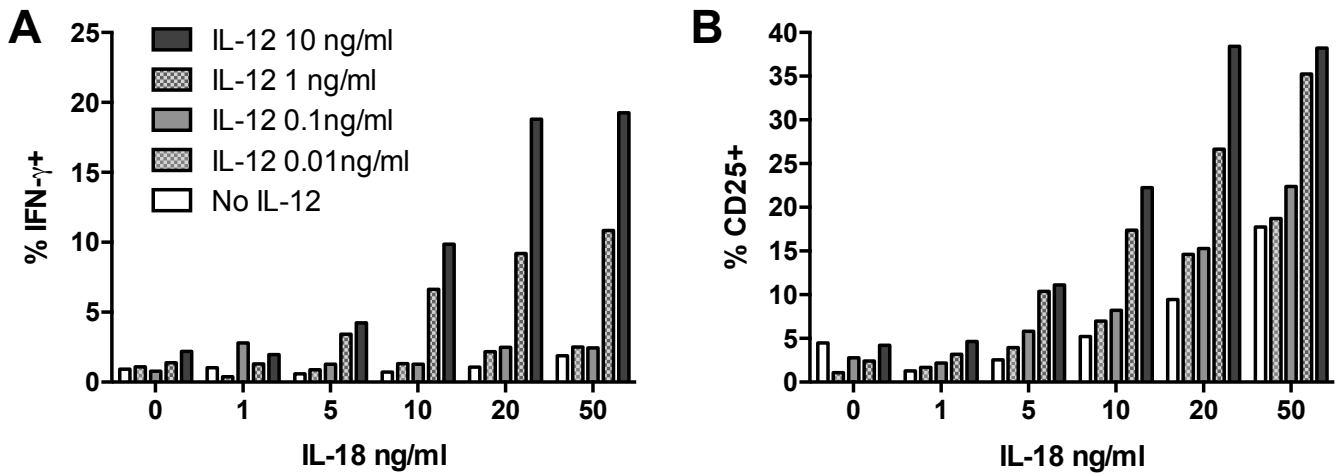

**Supplementary Figure 2. IFN- $\alpha$  and IL-21 titrations.** PBMC were stimulated with increasing concentrations of IFN- $\alpha$  or IL-21. NK cell surface expression of CD25 was measured in response to Med (medium alone), 10pg, 100pg or 1000pg/ml IFN- $\alpha$  alone, or HCC, a positive control of high concentration IL-12 (5ng/ml) and IL-18 (50ng/ml), at 6 hours (A) and 18 hours (B), and to combinations of IFN- $\alpha$  (10pg/ml) and IL-2 (5ng/ml), IL-12 (12.5pg/ml), IL-15 (0.75ng/ml) or IL-18 (10ng/ml) after 18 hours (C) ( $n=8$ , data from 2 experiments). Likewise, intracellular production of IFN- $\gamma$  was measured after 18 hours in response to medium alone, IFN- $\alpha$  alone, or HCC (D) or in combination with IL-2, IL-12, IL-15 or IL-18 as previously mentioned (E) ( $n=4$ , data from 1 experiment). Expression of IL-18R $\alpha$  was also measured at 6 and 18 hours in response to IFN- $\alpha$  titration (F) and IL-21 titration (G) at the cytokine concentrations indicated on the graphs ( $n=4$ , data from 1 experiment). Finally, CD16 MFI of CD56<sup>dim</sup>CD16<sup>+</sup> NK cells was measured after 6 or 18 hours (H) ( $n=4$ , data from 1 experiment).

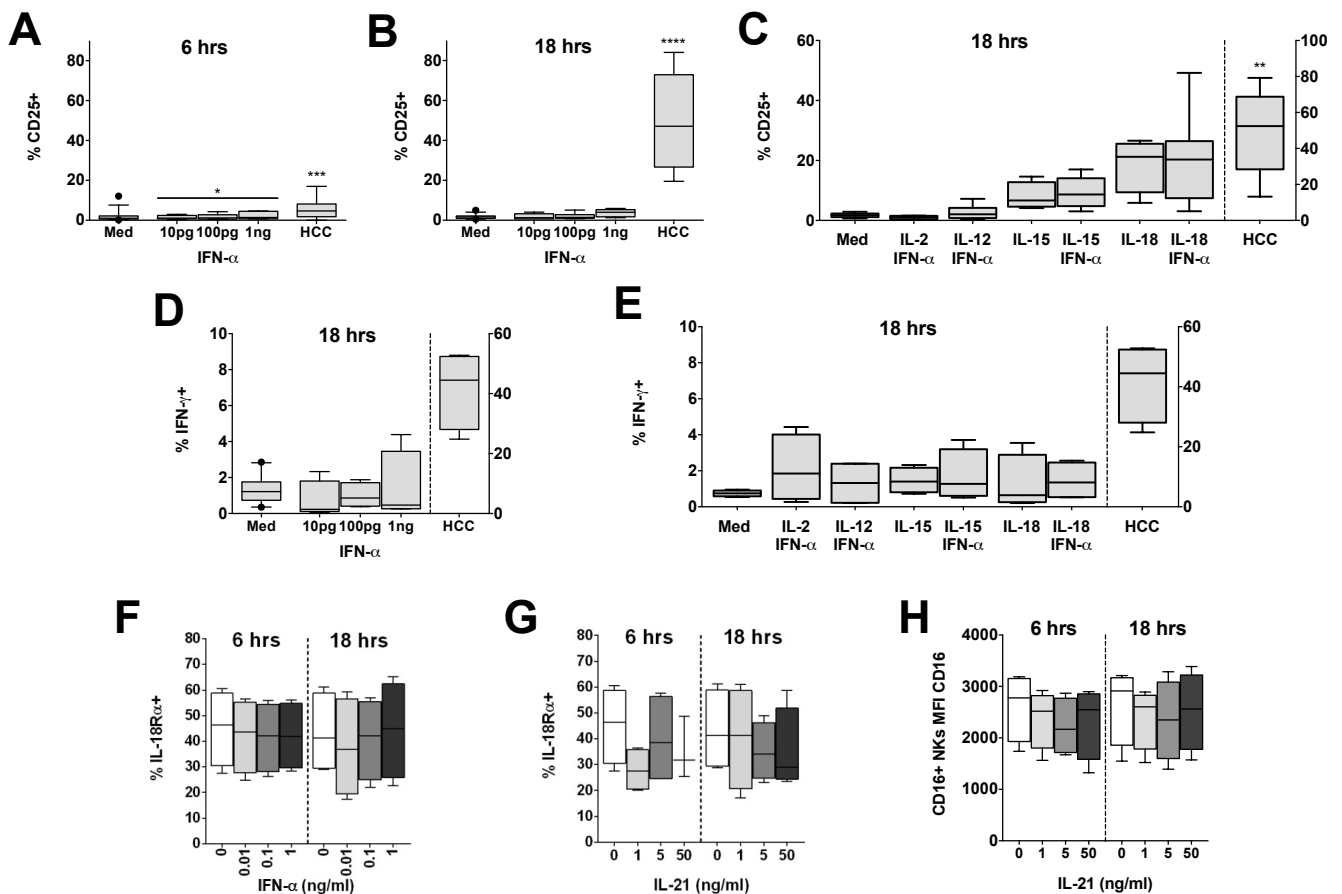

**Supplementary Figure 3. Low level IL-12R $\beta$ 2 upregulation following IL-15 or IL-18 stimulation.** PBMC were stimulated for 6 or 18 hours *in vitro* and changes in NK cell surface expression of IL-12R $\beta$ 2 was measured in response to Med (medium alone), IL-2, IL-12, IL-15, or IL-18. Representative flow cytometry plots show gating of CD3<sup>+</sup>CD56<sup>+</sup> NK cells and surface expression of IL-12R $\beta$ 2 on unstimulated cells (A). IL-12R $\beta$ 2 expression on NK cells was measured after stimulation with Med, IL-2, IL-12, IL-15, IL-18 (concentrations in ng/ml as labelled) or HCC after 6 hours (B) ( $n=7-16$ , data from 1-3 experiments) or 18 hours (C) ( $n=8-18$ , data from 2-3 experiments), with mean fluorescence intensity (MFI) of IL-12R $\beta$ 2 expression on NK cells for the same experiments at 6 hours (D) and 18 hours (E). NB: IL-2 titrations were performed using a different batch of anti-IL-12R $\beta$ 2-PerCP/Cy5.5 conjugated antibody. Data were analysed using paired Wilcoxon signed-rank tests (B-C: no lines; compared to Med) or ANOVA tests for linear trend for trend analysis across increasing cytokine concentrations including Med (B-C, uncapped lines). \*\*\* $p<0.001$ , \*\* $p<0.01$ , \* $p<0.05$ .

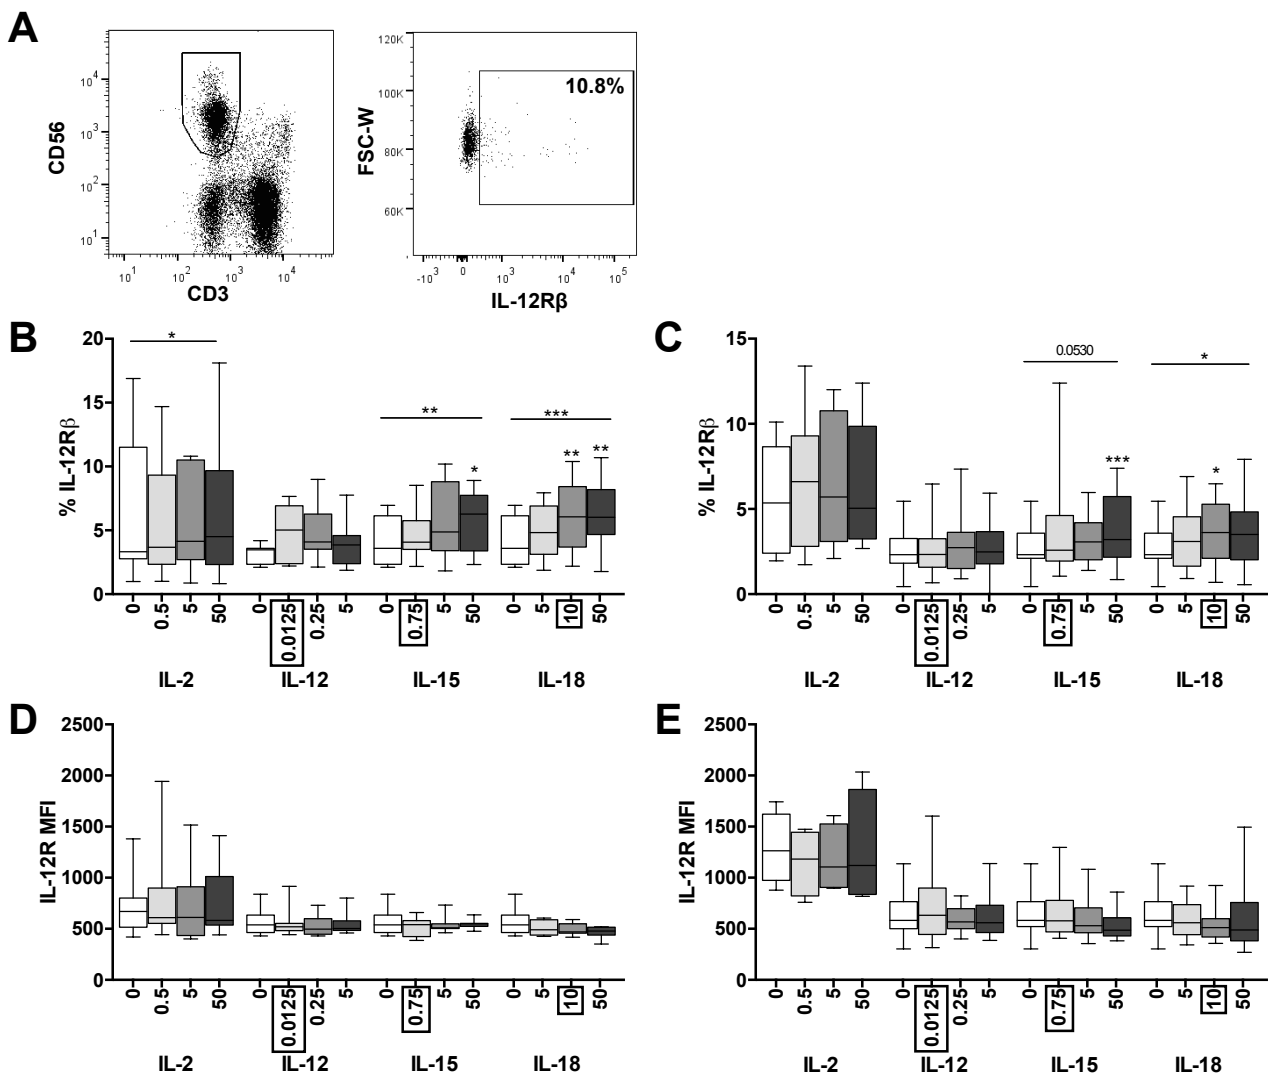

Supplement: Presentation_1.pdf [file Presentation_1.pdf]
